# Supplementary material for: IL-24 modulates the high mobility group (HMG) A1/miR222 /AKT signaling in lung cancer cells
Source: PubMed Central journal article supplement (PMC5342550; doi:10.18632/oncotarget.11838), 2016-09-02
Supplement: oncotarget-07-70247-s001.pdf [file oncotarget-07-70247-s001.pdf]

## IL-24 modulates the high mobility group (HMG) A1/miR222 / AKT signaling in lung cancer cells

### SUPPLEMENTARY FIGURES

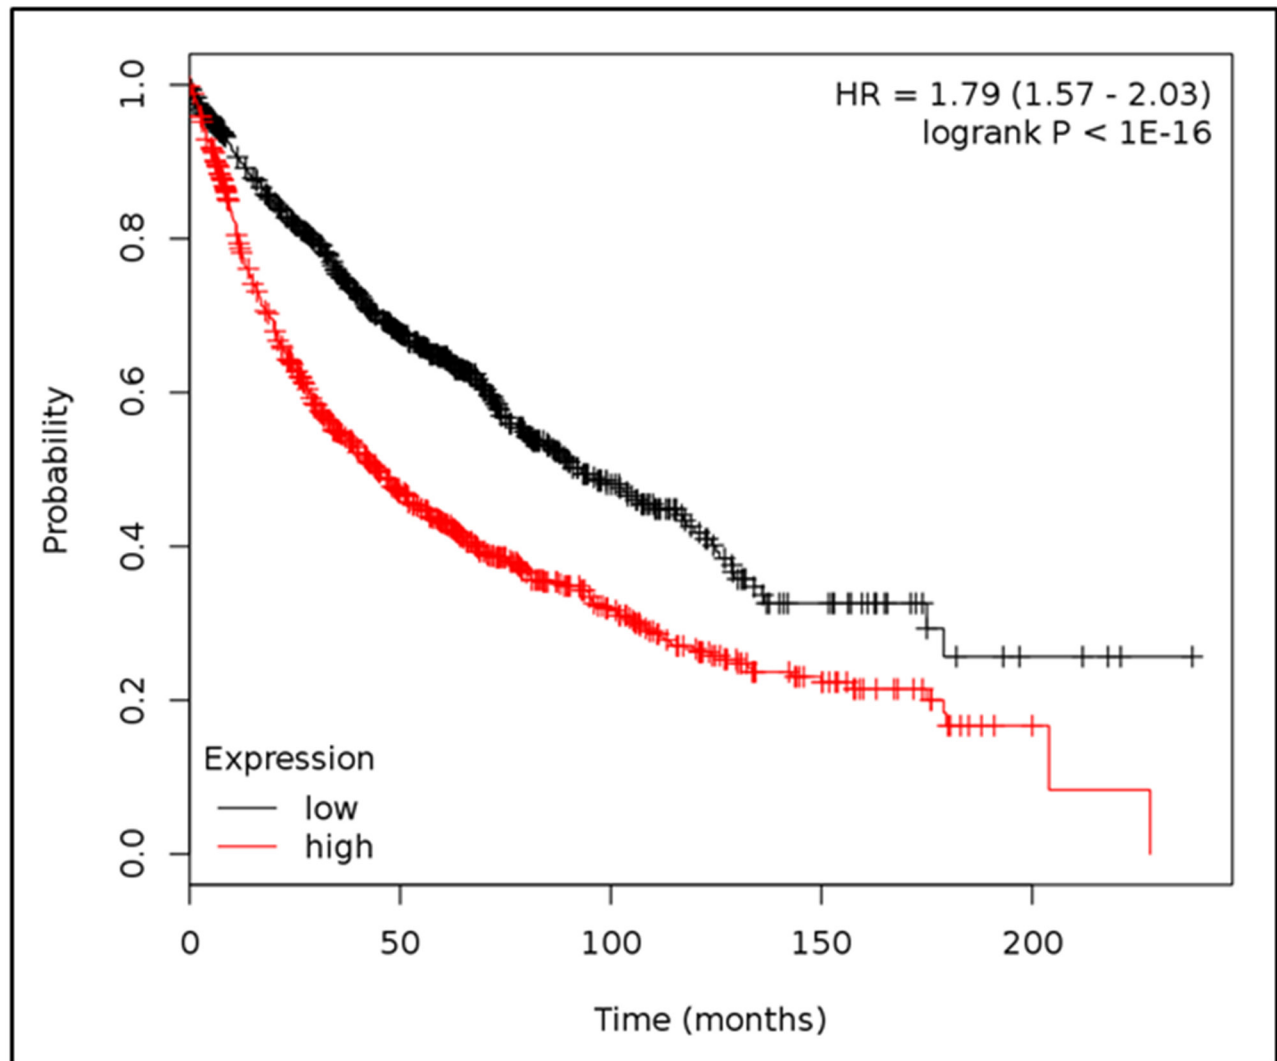

**Supplementary Figure S1: HMGA1 expression correlates with overall survival of lung cancer patients.** Correlation between HMGA1 gene expression and overall survival was determined in 1926 lung cancer patients using the K-M plot. Kaplan-Meier survival curve show patients with low HMGA1 expression had a higher overall survival than those with high expression (logrank  $p < 1E-16$ ).

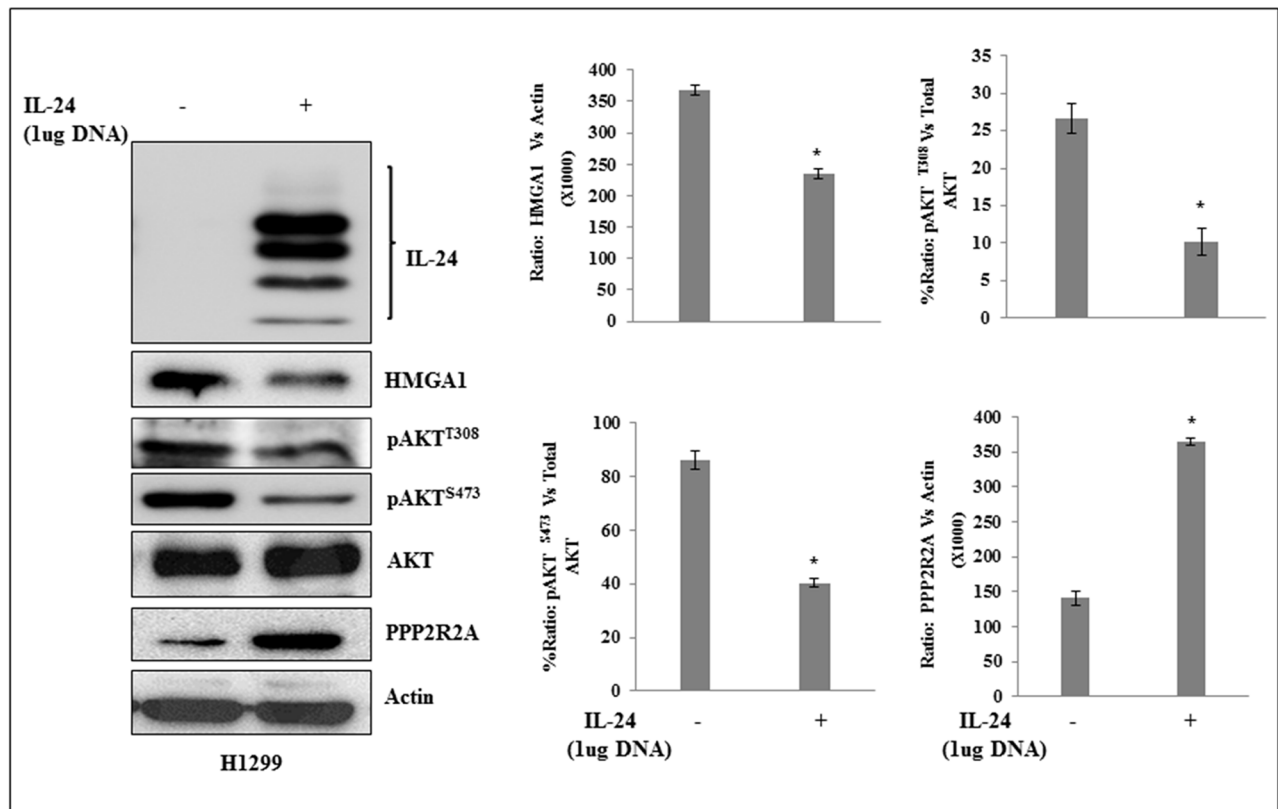

**Supplementary Figure S2: Transient transfection of IL-24<sup>wt</sup> plasmid inhibits HMGA1 and its downstream targets in H1299 cells.** Transient transfection of IL-24<sup>wt</sup> plasmid DNA reduced the expression of HMGA1, phosphorylated (p) AKT<sup>T308</sup>, and pAKT<sup>S473</sup>, and increased PPP2R2A expression in naïve H1299 cells compared with their respective non-transfected cells. Beta-actin was used as a protein loading control. Differences in the expression of the proteins were determined by semi-quantitative analysis and are presented in graphical format ( $p < 0.05$ ). Bars denote standard deviation (SD).

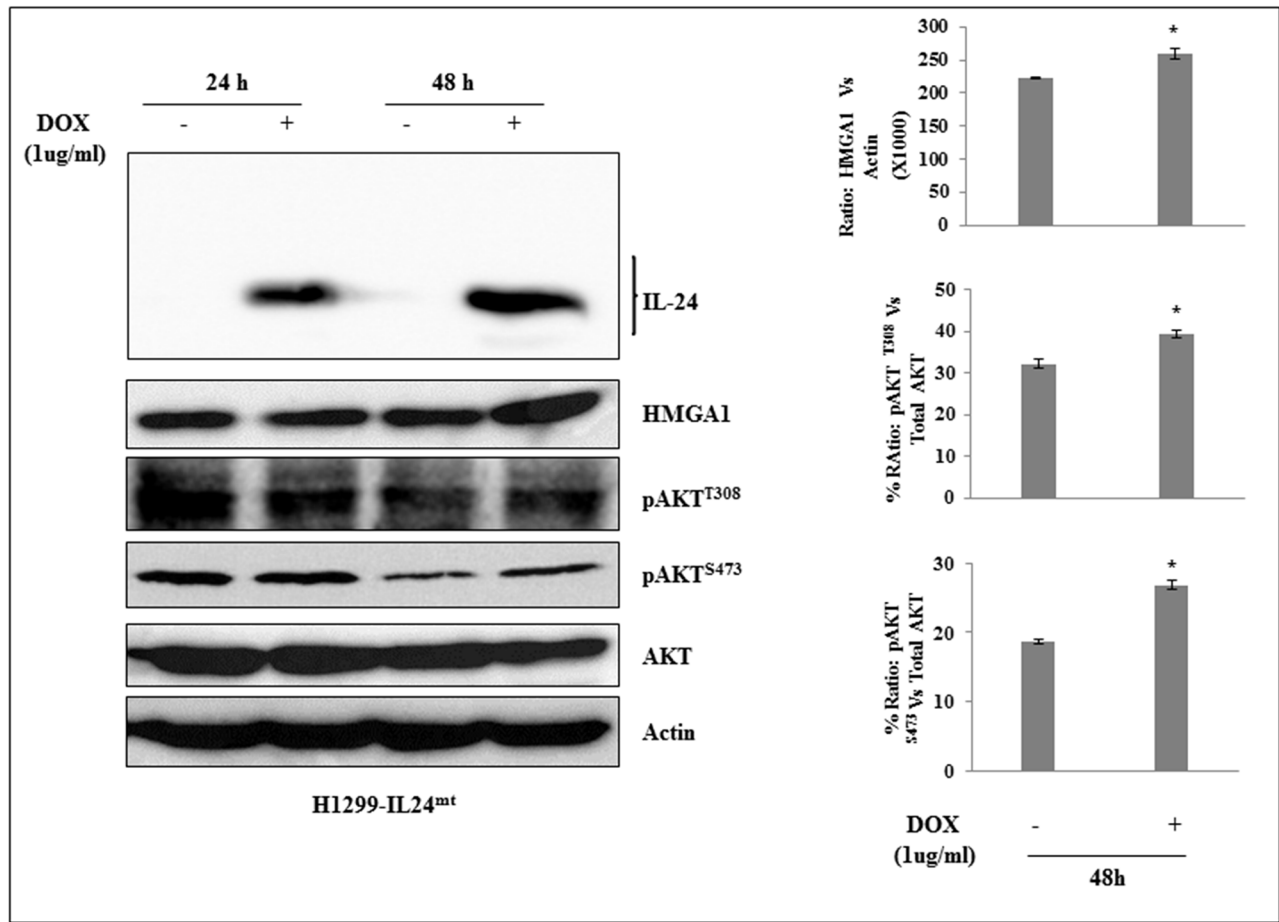

**Supplementary Figure S3: IL-24 wild-type, but not mutant, suppressed HMGA1 expression in H1299-IL24<sup>wt</sup> cells.** Western blotting analysis showed that IL-24<sup>wt</sup> protein expression in H1299-IL24 cells did not reduce the expression of HMGA1, phosphorylated (p) AKT<sup>T308</sup>, or pAKT<sup>S473</sup> at 24 h, but expression was markedly increased at 48 h after doxycycline treatment, compared with untreated control ( $p < 0.01$ ). Beta-actin was used as a protein loading control.

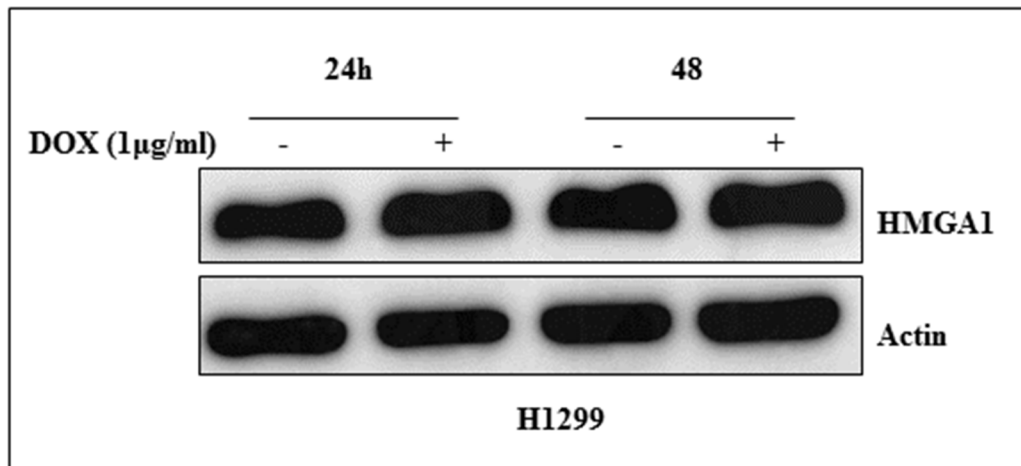

**Supplementary Figure S4: Doxycycline alone does not inhibit HMGA1 expression in H1299 cells.** The effect of doxycycline on HMGA1 expression was determined by treating naïve H1299 cells with 1 µg/ml doxycycline. Untreated cells served as controls. No significant HMGA1 inhibition was observed in doxycycline-treated cells compared with controls at 24 h or 48 h. Beta-actin was used as a protein loading control.

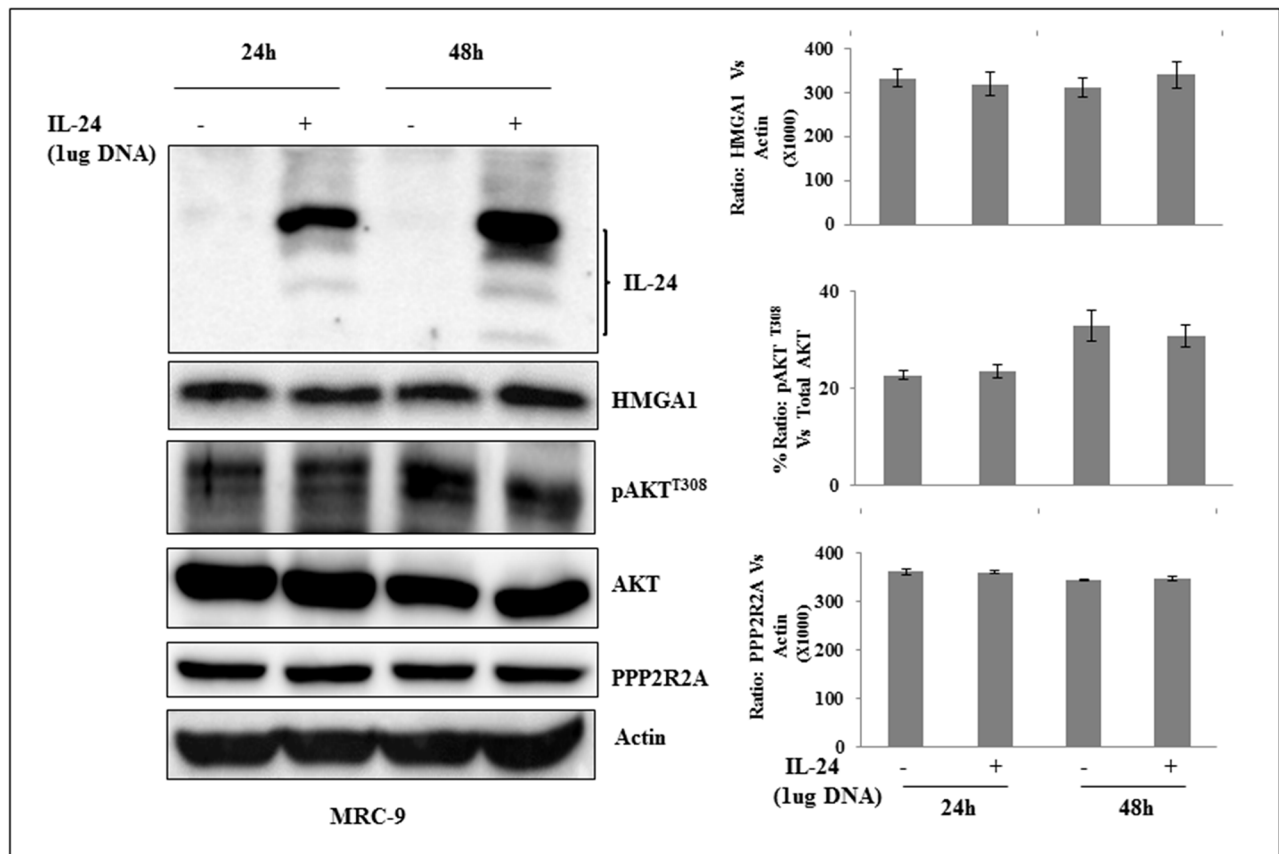

**Supplementary Figure S5: Effect of IL-24<sup>wt</sup> treatment on the HMGA1 axis in normal human lung fibroblast cells (MRC-9).** Transient transfection of IL-24<sup>wt</sup> plasmid DNA produced no noticeable change in the expression of HMGA1, pAKT<sup>T308</sup>, or PPP2R2A in MRC-9 cells compared with their respective non-transfected cells. Beta-actin was used as a protein loading control.

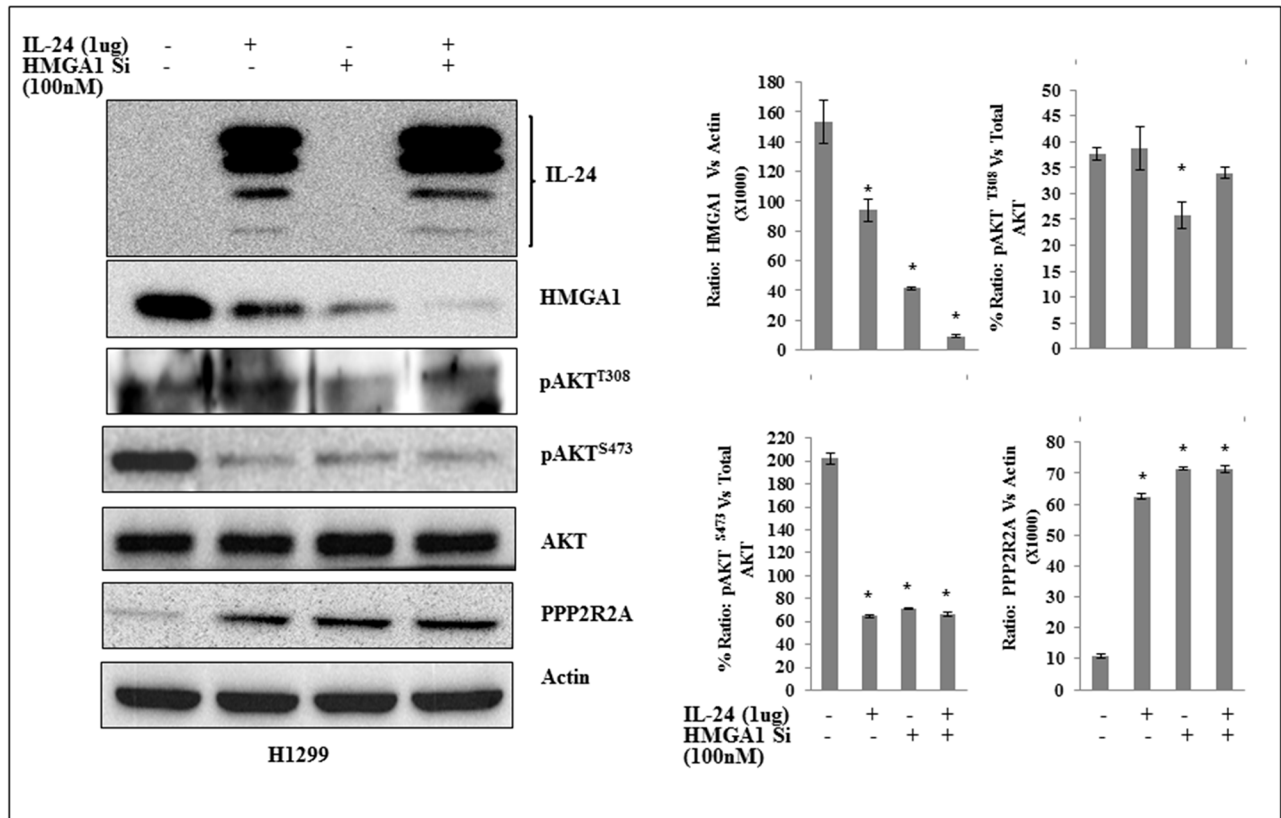

**Supplementary Figure S6: A combination of IL-24 and HMGA1-siRNA showed greater inhibition of AKT activation in H1299 cells.** Western blotting showed that all treatment groups showed reduction in the expression of HMGA1. Change in pAKT<sup>T308</sup>, and pAKT<sup>S473</sup>, and PPP2R2A expression was also observed in all three treatment groups compared with control. Beta-actin was used as a protein loading control. Differences in the expression of the proteins compared with untreated control were determined by semi-quantitative analysis and are presented in graphical format ( $p < 0.05$ ). Bars denote standard deviation (*SD*).

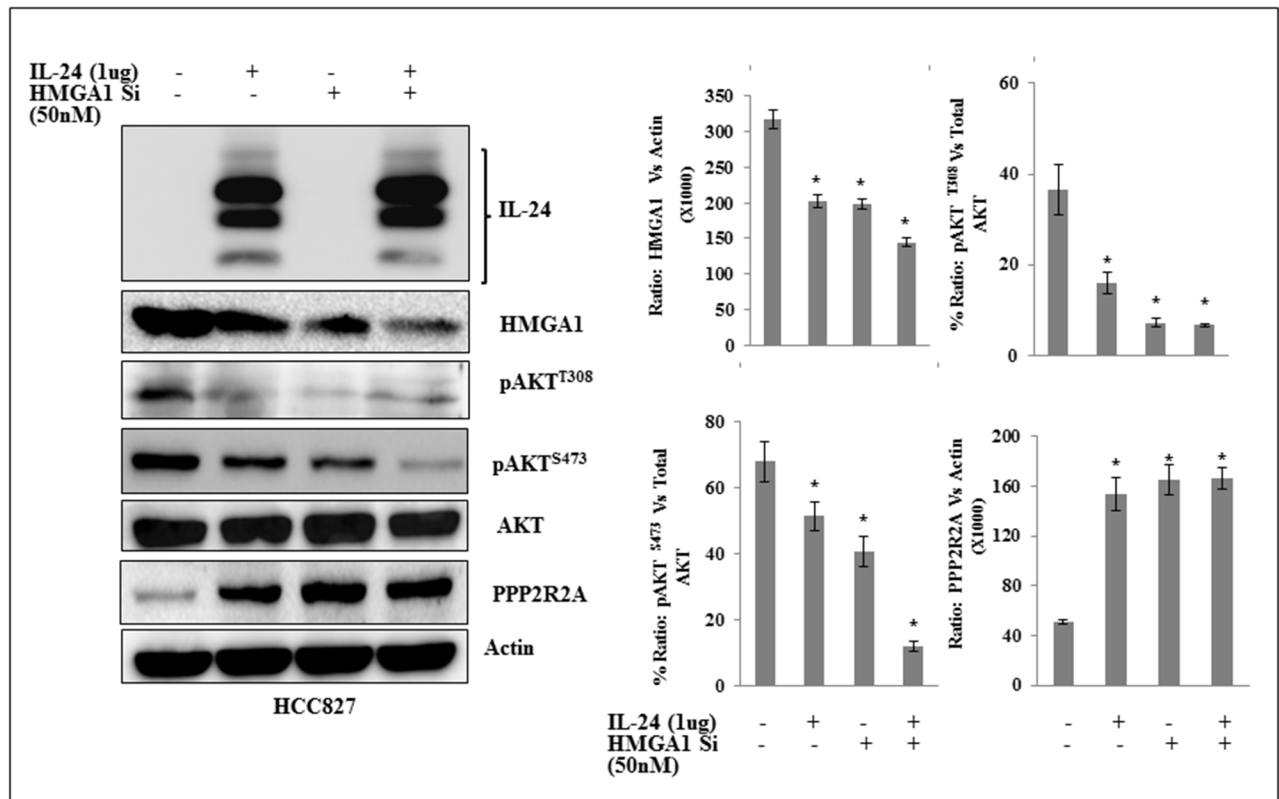

**Supplementary Figure S7: The combination of IL-24 and HMGA1-siRNA showed greater inhibition of AKT activation in HCC827 cells.** Western blotting showed that the combination of transient transfection of IL-24<sup>w1</sup> plasmid and HMGA1 siRNA produced greater reduction in the expression of HMGA1, and pAKT<sup>S473</sup> than was observed with all other treatments. Beta-actin was used as a protein loading control. Differences in the expression of the proteins compared with untreated control were determined by semi-quantitative analysis and are presented in graphical format ( $p < 0.05$ ). Bars denote standard deviation (SD).

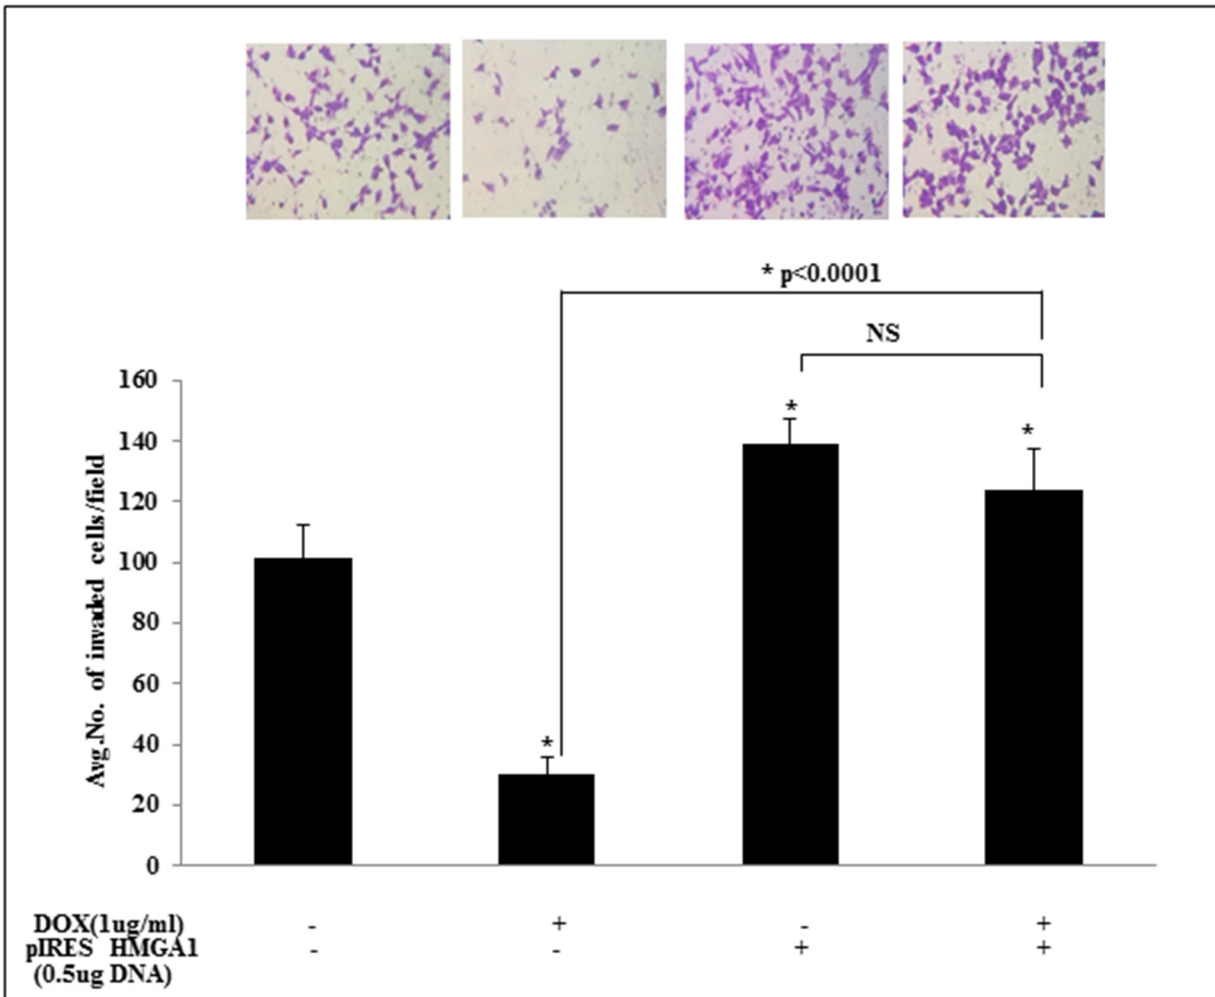

**Supplementary Figure S8: HMGA1 overexpression rescues IL-24<sup>wt</sup>-mediated inhibition on cell invasion.** Overexpression of HMGA1 using the pIRES-HMGA1 expression plasmid in H1299-IL-24<sup>wt</sup> cells resulted in significant abrogation of the IL-24<sup>wt</sup>-mediated inhibitory activity on cell invasion ( $p < 0.05$ ). NS denotes “not significant”.

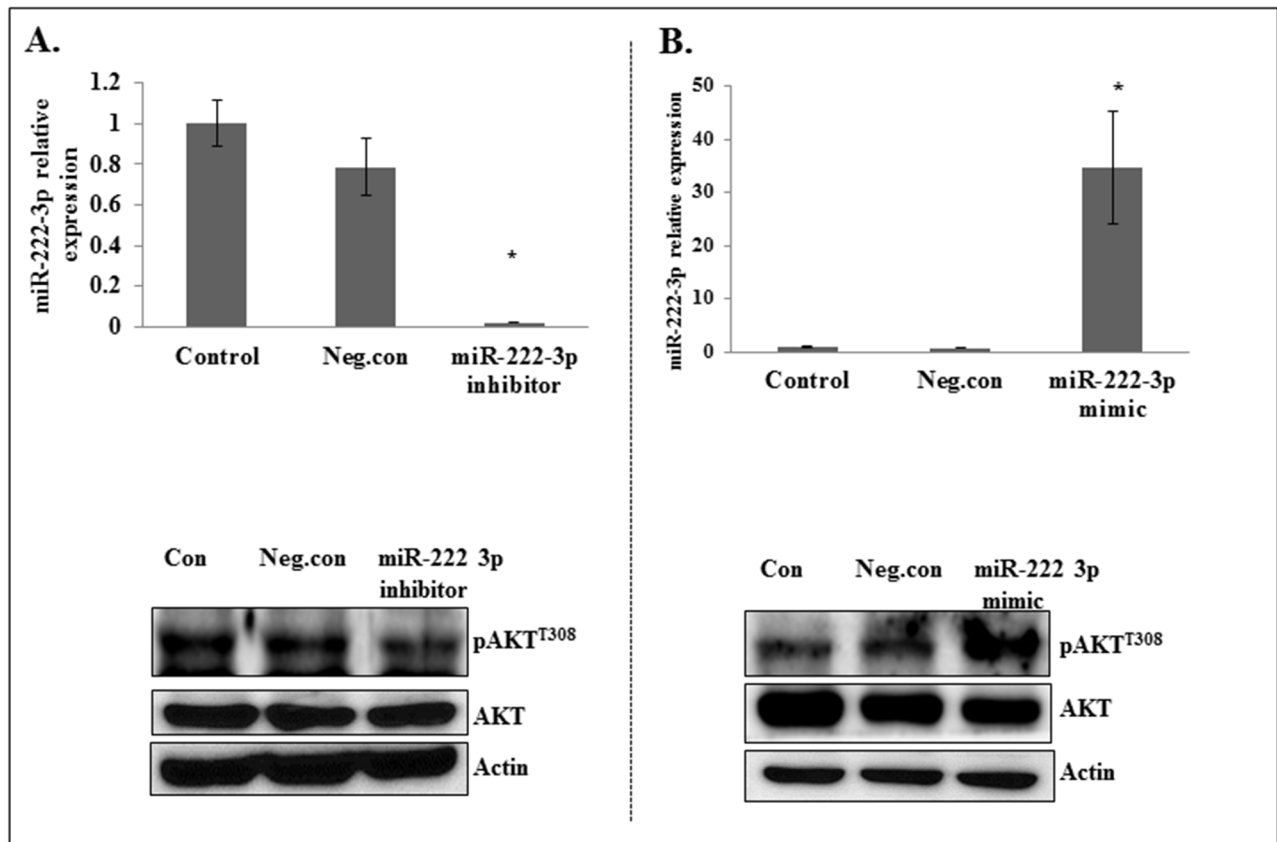

**Supplementary Figure S9: miR-222-3p inhibitor and mimic are target-specific.** **A.** RT-PCR and western blot analysis showed that the miR-222-3p inhibitor which was used to inhibit miR-222-3p expression in H1299- IL-24<sup>wt</sup> cells was target-specific when compared with untreated and negative controls. Asterisk denotes significance ( $p < 0.0001$ ). **B.** RT-PCR and western blot analysis showed that the miR-222-3p mimic which was used to mimic miR-222-3p expression in H1299- IL-24<sup>wt</sup> cells is target-specific in H1299-IL-24<sup>wt</sup> cells, when compared with untreated and negative controls. Asterisk denotes significance ( $p < 0.001$ ). Beta-actin was used as a protein loading control ( $p < 0.05$ ).
